# Supplementary material for: NKTR-102 Efficacy versus irinotecan in a mouse model of brain metastases of breast cancer
Source: PubMed Central journal article supplement (PMC4604629; doi:10.1186/s12885-015-1672-4), 2015-10-13
Supplement: 12885_2015_1672_MOESM1_ESM.pdf [file 12885_2015_1672_MOESM1_ESM.pdf]

## SUPPLEMENTAL METHODS

### *Chemicals*

All doses and plasma and tumor concentrations of NKTR-102 are expressed based on irinotecan content, enabling a direct comparison with irinotecan. Irinotecan and NKTR-102 were dissolved in vehicle containing 6 mg/mL lactic acid and 5% Dextrose in Water (4.5), and the pH was adjusted to 5-6. Dosing solutions were filtered into sterile containers via 0.45µm PVDF filters (Millipore) prior to administration.

### *Cell Culture*

For preparation of MDA-MB-231Br-Luc cells for intracardiac injection, cells were grown to 70% confluency, trypsinized, and rinsed twice in 4°C sterile PBS to remove all traces of serum and trypsin. Cells were re-suspended in serum-free 4°C DMEM media and placed on ice.

### *LC/MS/MS to estimate NKTR-102 in Brain Tumors*

Intracranial implantation was initiated as previously described . under 2% isoflurane and injection of  $5 \times 10^5$  MDA-MB-231Br-Luc cells using a stereotaxic manual injector (Stoelting, Wood Dale, IL). Coordinates were set to 2.5 mm right (lateral) to bregma and approximately 4 mm deep. Tumors were allowed to grow to 20-30 mg in size (30 days or until neurological symptoms appeared) before intravenous bolus administration of irinotecan (50 mg/kg) or NKTR-102 (50 mg/kg). Animals (n=5/timepoint) were sacrificed under anesthesia (ketamine/xylazine; 100 mg/kg and 8 mg/kg respectively) at pre-determined time points (pre-dose, 2, 6, and 24 hours after irinotecan; pre-dose, 6, 24, 168 hours after NKTR-102) to harvest blood and tumor samples. Blood (2 mL) was collected into tubes containing NaF and Na<sub>2</sub>EDTA and

processed to plasma (5000 xg, 5 min, 2-8 °C). Plasma was stabilized with 2 mM PMSF and 1% glacial acetic acid, and stored frozen (- 80 °C) until analysis. Brain tumors were surgically resected, weighed, added to 2 mL preservation solution (2 mM PMSF and 1% glacial acetic acid, and stored frozen (- 80 °C)) until analysis. Plasma and brain tumor samples were assayed for NKTR-102, irinotecan, and SN38 using liquid chromatography–tandem mass spectrometry (LC/MS/MS) methods. Briefly, plasma and tumor samples were defrosted; tumor samples were homogenized prior to extraction of analytes. Irinotecan and SN38 were extracted using protein precipitation with acetonitrile followed by liquid-liquid extraction with methyl tertiary butyl ether and quantified by LC/MS/MS, using calibration standards containing irinotecan and SN38. LC/MS/MS used an Onyx Monolythic C18, 100 x 3-mm column, operated at 30 °C, at a flow rate of 1-2.5 mL/min with a gradient consisting of 0.1% formic acid in water and 0.2% formic acid in 75:25 acetonitrile:methanol coupled to an API 4000 (Applied Biosystems). NKTR-102 was extracted from plasma using protein precipitation with acetonitrile. Supernatant from protein precipitation containing NKTR-102 was directly quantified by LC-MS/MS, using calibration standards consisting of NKTR-102. LC-MS/MS used an Intrada WP-RP, 50 x 2.0-mm column, operated at 60 °C, at a flow rate of 0.5-1.0 mL/min with a gradient consisting of 0.8% formic acid in water and 0.8% formic acid in acetonitrile, coupled to an API 4000 (Applied Biosystems). The lower limits of quantitation for NKTR-102 were 5 ng/mL in plasma, and 2 ng/g in brain tumor homogenate. The lower limits of quantitation for irinotecan and SN38 were 1 ng/mL and 0.2 ng/mL in plasma, and 0.05 ng/g and 0.009 ng/g in tumor homogenate, respectively.

#### *Quantitative autoradiography*

Microscope slides with brain slices were placed in QAR cassettes (FujiFilm Life Sciences, Stamford, CT) along with  $^{14}\text{C}$  autoradiographic standards (GE Healthcare, Piscataway, NJ). A phosphor screen (FujiFilm Life Sciences, 20 × 40 super-resolution) was placed with the slides and standards and allowed to develop for 6 to 14 days. QAR phosphor screens were developed in a high-resolution phosphor-imager (FUJI FLA-7000, FujiFilm Life Sciences) and converted to digital images. Digital QAR images were calibrated to  $^{14}\text{C}$  standards and analyzed using MCID Analysis software (InterFocus Imaging LTD, Linton, Cambridge, England).

#### *Histologic Evaluation of Brain Metastasis after Treatment*

At the end of the survival study, brains from select animals (n=4/treatment group) were harvested, sectioned, and mounted onto slides. Slides were stained with H&E to visualize brain metastases. Brain sections were evaluated using an Olympus MVX10 microscope with a 2X objective (NA=0.5) and an optical zoom of (0.63-6.3X) to determine size and number of brain metastases. Brains were harvested from animals that were euthanized on days 37-43 in the vehicle and irinotecan treatment groups, on days 37, 42, 75, and 99 in the 10 mg/kg NKTR-102 treatment group, and on days 49, 49, 99, and 99 in the 50 mg/kg NKTR-102 treatment group. Metastases (number and size) were counted on 5-10 sections per brain and averaged across sections and animals.
